# Supplementary material for: Dual-Parameter Profiling of Synergistic and Antagonistic Epigenetic-Targeted Drug Combinations in Cancer: An In Silico Framework for Therapeutic Index Optimization
Source: Research Square preprint supplement (doi:10.21203/rs.3.rs-7999417/v1), 2025-12-03
Supplement: Supplementary file 1 [file 21f7dbdccacf3725f07a3bca.xlsx]

## Sheet: SynergyFinder_summary_table1_20
	Table3 Overview of the top synergistic and antagonistic combinations
drug1	drug2	ZIP_synergy	HSA_synergy	Loewe_synergy	Bliss_synergy	css
HYDRALAZINE	ETHINYL ESTRADIOL	34.5256	46.8614	46.8614	34.5256	81.3816
HYDRALAZINE	GEFITINIB	14.9423	21.4324	21.4182	14.9423	102.632
EVEROLIMUS	VALPROIC ACID	14.9069	19.2414	19.1728	14.9069	89.2016
EVEROLIMUS	HYDRALAZINE	11.2683	21.3314	21.274	11.2683	91.2916
ROMIDEPSIN	FULVESTRANT	9.68567	8.80756	9.60234	8.94149	56.758
ROMIDEPSIN	FULVESTRANT	8.50893	8.89493	3.30442	8.91956	25.804
HYDRALAZINE	IMATINIB	8.2222	11.0324	11.002	8.2222	102.892
ROMIDEPSIN	FULVESTRANT	6.92306	7.09942	7.06184	6.91278	21.707
PARGYLINE	TAMOXIFEN	6.89112	20.5224	20.5188	6.89112	48.7416
TAMOXIFEN	VALPROIC ACID	6.67136	16.8814	16.8544	6.67136	46.1216
ROMIDEPSIN	FULVESTRANT	6.54791	7.3533	-0.155317	7.66339	34.656
ROMIDEPSIN	FULVESTRANT	6.24116	7.34395	6.37262	7.02762	20.9385
ROMIDEPSIN	FULVESTRANT	5.61888	5.71304	-4.18107	6.27724	20.7275
ROMIDEPSIN	ERLOTINIB HYDROCHLORIDE	5.22118	7.00208	6.06122	6.94598	32.845
ROMIDEPSIN	ERLOTINIB HYDROCHLORIDE	4.98283	4.10097	-16.3012	3.02591	59.044
HYDRALAZINE	TAMOXIFEN	4.97355	23.4514	23.4454	4.97355	57.9716
TAMOXIFEN CITRATE	ROMIDEPSIN	4.80864	0.950281	-30.5795	-1.32119	51.2325
TAMOXIFEN CITRATE	ROMIDEPSIN	4.52426	4.55506	3.29258	3.89754	45.331
ROMIDEPSIN	FULVESTRANT	4.45811	7.10257	8.49981	5.93273	13.8335
FLUTAMIDE	VALPROIC ACID	4.37478	14.2414	14.2154	4.37478	45.8616
ROMIDEPSIN	FULVESTRANT	4.27049	4.50175	3.29328	5.20549	39.852
ROMIDEPSIN	FULVESTRANT	4.17058	4.79759	5.05229	4.68198	30.5285
ROMIDEPSIN	FULVESTRANT	4.03088	3.95654	2.32677	3.99909	16.38
TAMOXIFEN CITRATE	ROMIDEPSIN	3.76944	4.36983	4.24465	4.91542	66.0065
ROMIDEPSIN	LAPATINIB	3.70111	5.63232	10.4214	3.03542	30.684
IMATINIB	ROMIDEPSIN	3.53033	4.22506	-15.2388	2.52214	38.9095
ROMIDEPSIN	FULVESTRANT	3.27723	4.54026	1.6978	4.00959	22.4675
ROMIDEPSIN	FULVESTRANT	3.2518	3.48309	3.68861	2.82414	17.993
ROMIDEPSIN	LAPATINIB	3.07697	6.43676	5.66482	2.651	31.966
ROMIDEPSIN	FULVESTRANT	3.03658	3.44877	-7.63657	2.96034	60.839
IMATINIB	ROMIDEPSIN	2.99151	3.18784	3.33578	2.32123	32.631
ROMIDEPSIN	ERLOTINIB HYDROCHLORIDE	2.93175	3.56068	3.83124	4.31881	63.09
TAMOXIFEN CITRATE	ROMIDEPSIN	2.92892	2.32464	-17.6653	2.62213	50.3555
ROMIDEPSIN	ERLOTINIB HYDROCHLORIDE	2.71954	7.54314	6.56265	1.94223	68.8215
NILOTINIB	ROMIDEPSIN	2.71075	1.90115	-11.6492	2.08874	24.538
IMATINIB	ROMIDEPSIN	2.64637	2.68246	2.69815	2.86475	0.4755
IMATINIB	ROMIDEPSIN	2.62982	6.21738	2.11623	5.44897	21.308
TAMOXIFEN CITRATE	ROMIDEPSIN	2.6184	1.93832	-3.48317	0.993753	23.982
IMATINIB	AZACITIDINE	2.5815	6.10243	6.07425	2.5815	102.312
IMATINIB	ROMIDEPSIN	2.58111	2.39052	2.14024	1.47803	19.3165
ROMIDEPSIN	FULVESTRANT	2.43919	1.34675	-30.3334	2.2763	51.296
ROMIDEPSIN	FULVESTRANT	2.34012	2.06991	-2.00314	1.82005	18.4455
ROMIDEPSIN	SUNITINIB	2.31649	3.71089	3.60024	4.27903	64.824
SUNITINIB	AZACITIDINE	2.30317	3.38243	3.38017	2.30317	99.5916
ROMIDEPSIN	LAPATINIB	2.29917	3.13763	3.06195	-0.60101	48.8435
TAMOXIFEN CITRATE	ROMIDEPSIN	2.25953	2.8633	2.85185	3.13326	5.768
ROMIDEPSIN	ERLOTINIB HYDROCHLORIDE	2.13254	3.66728	7.54058	4.37732	28.4435
ROMIDEPSIN	LAPATINIB	2.08259	4.40207	5.7801	1.24968	53.6145
ROMIDEPSIN	ERLOTINIB HYDROCHLORIDE	2.0331	3.11351	-15.1432	3.20432	21.518
IMATINIB	ROMIDEPSIN	1.91462	1.66391	3.99752	2.35045	29.3575
AZACITIDINE	FLUTAMIDE	1.87387	2.72141	2.68054	1.87387	99.9516
ROMIDEPSIN	SUNITINIB	1.87083	2.45207	2.73572	2.17124	15.933
ROMIDEPSIN	FULVESTRANT	1.77148	3.67487	4.87975	2.56601	23.7975
AZACITIDINE	EVEROLIMUS	1.70192	3.61141	3.60834	1.70192	100.842
ROMIDEPSIN	FULVESTRANT	1.676	1.48673	-10.7713	1.48851	30.693
ROMIDEPSIN	ARSENIC TRIOXIDE	1.62145	1.36247	0.274861	2.22219	35.0605
ROMIDEPSIN	FULVESTRANT	1.60865	1.7773	-2.8004	1.75369	11.476
GEFITINIB	AZACITIDINE	1.5756	4.69243	4.64735	1.5756	100.902
TAMOXIFEN CITRATE	ROMIDEPSIN	1.57375	2.24924	-6.20848	1.81161	17.172
ROMIDEPSIN	ERLOTINIB HYDROCHLORIDE	1.55021	1.28308	-21.792	1.04528	69.1585
ROMIDEPSIN	SORAFENIB	1.48552	1.93247	-19.6889	1.91722	32.5925
ROMIDEPSIN	FULVESTRANT	1.47862	1.94585	0.693591	2.01491	4.873
TAMOXIFEN CITRATE	ROMIDEPSIN	1.43283	2.12184	-7.9941	1.74553	44.932
ETHINYL ESTRADIOL	AZACITIDINE	1.26956	2.02243	2.02242	1.26956	98.2316
ROMIDEPSIN	ARSENIC TRIOXIDE	1.26152	1.96889	4.86304	0.591561	33.087
ROMIDEPSIN	ARSENIC TRIOXIDE	1.24549	2.47541	2.68459	1.70865	60.732
TRETINOIN	ROMIDEPSIN	1.23351	-1.76006	-44.5729	-0.348727	57.7985
ROMIDEPSIN	LAPATINIB	1.19788	0.948518	-25.6535	0.785463	22.0935
ROMIDEPSIN	ARSENIC TRIOXIDE	1.1849	0.398727	5.3727	1.80908	16.4025
ROMIDEPSIN	FULVESTRANT	1.15416	1.97036	-1.33063	2.17761	5.956
ROMIDEPSIN	FULVESTRANT	1.13689	1.23404	-8.16009	0.25592	18.7625
ROMIDEPSIN	LAPATINIB	1.01032	-0.495772	2.3492	-2.24881	67.057
TRETINOIN	ROMIDEPSIN	0.993313	1.68218	1.88733	0.504288	19.7805
ROMIDEPSIN	ERLOTINIB HYDROCHLORIDE	0.902338	2.36791	-7.64975	2.97232	30.85
NILOTINIB	ROMIDEPSIN	0.858724	-1.41069	6.2069	1.55799	50.359
ROMIDEPSIN	LAPATINIB	0.832788	0.290893	0.84161	-0.334503	63.1855
GEFITINIB	PARGYLINE	0.826527	4.02141	4.01917	0.826527	86.2416
ROMIDEPSIN	LAPATINIB	0.777414	1.67924	-12.0049	0.509841	43.7235
TAMOXIFEN CITRATE	ROMIDEPSIN	0.7382	4.1337	3.37502	2.97433	49.9335
ROMIDEPSIN	ERLOTINIB HYDROCHLORIDE	0.637452	0.986678	-8.19012	0.449141	38.1625
ROMIDEPSIN	DASATINIB	0.609864	2.25642	2.71588	-0.318876	18.2015
ROMIDEPSIN	ERLOTINIB HYDROCHLORIDE	0.551961	0.343515	-8.46283	0.39997	41.598
SORAFENIB	AZACITIDINE	0.540387	1.11243	1.08859	0.540387	97.3216
TAMOXIFEN CITRATE	ROMIDEPSIN	0.511048	-0.675217	-33.3369	-0.658279	56.282
ROMIDEPSIN	SUNITINIB	0.492546	0.474642	-15.0296	-0.0492549	41.721
TRETINOIN	ROMIDEPSIN	0.490232	1.61099	1.141	0.360129	30.9235
ROMIDEPSIN	ARSENIC TRIOXIDE	0.42892	2.56856	40.3977	1.41855	81.715
ROMIDEPSIN	LAPATINIB	0.416079	-0.814663	0.706244	-2.83911	48.935
NILOTINIB	ROMIDEPSIN	0.387615	0.77319	-8.73416	0.421529	31.9905
ROMIDEPSIN	SORAFENIB	0.37054	0.163114	-190.778	0.406643	57.514
ROMIDEPSIN	SORAFENIB	0.333291	-0.0602189	-215.561	0.105468	57.6905
ROMIDEPSIN	ERLOTINIB HYDROCHLORIDE	0.31637	0.940373	3.17601	1.20716	43.0215
ROMIDEPSIN	SORAFENIB	0.254571	-0.435198	-48.817	1.15133	45.0465
ROMIDEPSIN	ARSENIC TRIOXIDE	0.225859	1.95229	-1.27463	1.88863	50.7205
ROMIDEPSIN	LAPATINIB	0.207705	-3.49918	-24.9953	-2.5122	27.7685
ROMIDEPSIN	SORAFENIB	0.194034	-2.17121	32.1956	-3.68171	10.787
NILOTINIB	ROMIDEPSIN	0.0933547	0.589085	-10.0139	0.874228	29.999
TRETINOIN	ROMIDEPSIN	0.0462025	1.22796	-3.39085	2.2354	27.457
ROMIDEPSIN	SORAFENIB	0.0392789	0.101294	-18.5005	0.0391479	55.807
ROMIDEPSIN	SORAFENIB	-0.0270683	0.528555	-0.218202	1.43561	29.0835
ROMIDEPSIN	SORAFENIB	-0.0570868	-0.169334	-21.1776	0.549221	62.08
TRETINOIN	ROMIDEPSIN	-0.0821991	1.40343	-0.411314	-0.513127	60.552
IMATINIB	ROMIDEPSIN	-0.0822069	1.00682	-6.87944	1.70903	10.6875
TRETINOIN	ROMIDEPSIN	-0.105178	-0.28801	0.563482	0.434988	0.5625
ROMIDEPSIN	DASATINIB	-0.132544	-1.50918	-30.3149	-0.383491	45.0325
TAMOXIFEN CITRATE	ROMIDEPSIN	-0.16145	-0.135298	-12.6615	-1.00658	35.423
TRETINOIN	ROMIDEPSIN	-0.227906	-0.302714	-16.6478	0.592154	38.6545
TRETINOIN	ROMIDEPSIN	-0.293284	-0.922157	-29.6598	-0.145778	16.542
NILOTINIB	ROMIDEPSIN	-0.2957	2.05081	-0.412505	0.906308	41.9665
TRETINOIN	ROMIDEPSIN	-0.391317	-1.76078	-28.7599	-1.61204	43.3985
ROMIDEPSIN	ERLOTINIB HYDROCHLORIDE	-0.437691	1.22952	1.58905	1.68173	34.3725
ROMIDEPSIN	ARSENIC TRIOXIDE	-0.476638	-0.806867	1.29403	-0.736738	37.091
TAMOXIFEN CITRATE	ROMIDEPSIN	-0.477835	0.560122	-9.99708	-0.609451	21.2015
ROMIDEPSIN	ERLOTINIB HYDROCHLORIDE	-0.481951	-1.108	-14.0266	-1.44606	67.5535
NILOTINIB	ROMIDEPSIN	-0.482237	-0.936384	-10.1748	-0.926444	40.754
ROMIDEPSIN	DASATINIB	-0.500376	-0.570306	177.354	-2.2994	5.9815
IMATINIB	ROMIDEPSIN	-0.548999	0.687498	-0.769691	0.308252	47.548
ROMIDEPSIN	SORAFENIB	-0.5571	-0.36089	-3.6425	-0.713562	10.131
ROMIDEPSIN	ERLOTINIB HYDROCHLORIDE	-0.563854	-1.12954	-19.9294	-1.53029	24.215
ROMIDEPSIN	DASATINIB	-0.599713	-2.79022	0.261132	-3.91332	58.8955
ROMIDEPSIN	SUNITINIB	-0.610746	2.27472	3.0935	2.47504	18.3855
ROMIDEPSIN	LAPATINIB	-0.610747	0.782888	-5.48767	-2.76547	40.137
ROMIDEPSIN	SORAFENIB	-0.613237	0.723255	0.710974	0.123305	6.5585
ROMIDEPSIN	ERLOTINIB HYDROCHLORIDE	-0.628745	-0.792393	-20.7285	-1.66062	43.821
NILOTINIB	ROMIDEPSIN	-0.63286	0.260184	-8.11182	0.252242	6.633
ROMIDEPSIN	ARSENIC TRIOXIDE	-0.652707	-0.105273	-0.171448	-0.56936	32.7985
ROMIDEPSIN	LAPATINIB	-0.665034	-1.97335	-11.0729	-2.67103	13.909
ROMIDEPSIN	SORAFENIB	-0.694653	0.199323	0.487961	-0.455379	25.653
TRETINOIN	ROMIDEPSIN	-0.718258	-0.18435	4.03764	-1.25278	27.955
TAMOXIFEN	AZACITIDINE	-0.726016	0.382431	0.3655	-0.726016	96.5916
ROMIDEPSIN	LAPATINIB	-0.768223	-1.02699	-46.0183	-3.51694	49.4695
PAZOPANIB HYDROCHLORIDE	ROMIDEPSIN	-0.803621	-2.20409	-22.8074	-2.51509	36.9195
ROMIDEPSIN	LAPATINIB	-0.808166	-0.461688	-33.8289	-0.110636	26.2735
TRETINOIN	ROMIDEPSIN	-0.932586	-2.19324	-2.43756	-2.14153	79.9495
NILOTINIB	ROMIDEPSIN	-0.942341	0.761007	5.86748	-0.0424503	34.136
TRETINOIN	ROMIDEPSIN	-0.95195	2.99112	2.60048	-0.98791	61.621
TAMOXIFEN CITRATE	ROMIDEPSIN	-0.993002	-0.388412	-0.930023	-0.739723	31.0325
ROMIDEPSIN	LAPATINIB	-1.06083	0.500958	0.537654	-1.41174	58.884
ROMIDEPSIN	LAPATINIB	-1.06826	0.00617876	-6.69781	-4.26935	29.1075
ROMIDEPSIN	LAPATINIB	-1.11494	-1.05582	-81.9785	-1.11915	66.428
TAMOXIFEN CITRATE	ROMIDEPSIN	-1.23388	-2.24493	-35.5219	-1.76265	68.583
IMATINIB	ROMIDEPSIN	-1.24361	0.743859	-13.3566	-2.62189	17.096
ROMIDEPSIN	DASATINIB	-1.28416	-0.15453	-8.00518	-1.11593	15.501
ROMIDEPSIN	ARSENIC TRIOXIDE	-1.34479	-1.49292	-2.11184	-0.869625	40.2735
ROMIDEPSIN	SUNITINIB	-1.35504	-0.0101531	11.5663	-2.6294	68.324
ROMIDEPSIN	SORAFENIB	-1.35758	-2.06918	-30.6824	-1.48725	10.242
ROMIDEPSIN	DASATINIB	-1.36137	-1.32918	-19.9293	-1.1652	49.303
ROMIDEPSIN	LAPATINIB	-1.3616	1.44051	1.94688	-0.104917	5.488
ROMIDEPSIN	ARSENIC TRIOXIDE	-1.381	-0.634239	6.13153	-1.14202	30.1705
ROMIDEPSIN	FULVESTRANT	-1.45243	-1.33555	-33.3278	-1.30996	22.7315
ROMIDEPSIN	FULVESTRANT	-1.54917	3.25777	27.0233	-1.74339	27.0955
ROMIDEPSIN	ARSENIC TRIOXIDE	-1.55369	-1.84029	-4.66526	-2.57887	11.1615
ROMIDEPSIN	ARSENIC TRIOXIDE	-1.57305	-4.24322	-20.6837	-5.31046	28.966
ROMIDEPSIN	SUNITINIB	-1.65268	-1.80689	-3.42909	-2.45541	56.636
TRETINOIN	ROMIDEPSIN	-1.78772	-2.32014	-20.0286	-3.84477	35.2385
ROMIDEPSIN	SUNITINIB	-1.80423	-1.08466	0.446032	-1.59858	55.132
IMATINIB	ROMIDEPSIN	-1.80568	-4.44893	-33.8659	-3.4625	25.9095
ROMIDEPSIN	ARSENIC TRIOXIDE	-1.81086	-0.0858188	7.01614	0.0322299	24.524
ROMIDEPSIN	DASATINIB	-1.82536	-4.10208	-23.0009	-2.50084	29.0515
NILOTINIB	ROMIDEPSIN	-1.83874	-4.34996	-23.1423	-4.53721	40.8485
ROMIDEPSIN	FULVESTRANT	-1.84941	-1.73978	-2.90206	-2.1708	1.634
ROMIDEPSIN	LAPATINIB	-1.89425	-1.10568	-1.54256	-3.6382	56.126
TRANYLCYPROMINE	EVEROLIMUS	-1.9085	3.59243	3.54203	-1.9085	72.5316
ROMIDEPSIN	LAPATINIB	-1.91151	-0.994598	-3.69212	-3.09317	25.1955
IMATINIB	ROMIDEPSIN	-1.95202	-1.83804	-27.7408	-1.74504	30.682
ROMIDEPSIN	FULVESTRANT	-1.97873	-1.61969	-3.70247	-1.26988	3.7145
TAMOXIFEN CITRATE	ROMIDEPSIN	-2.08629	0.0745798	-11.6117	1.08872	57.744
TAMOXIFEN CITRATE	ROMIDEPSIN	-2.08701	0.29103	-16.5961	1.12045	54.1855
IMATINIB	ROMIDEPSIN	-2.17035	-4.18132	-23.142	-3.96461	31.966
ROMIDEPSIN	LAPATINIB	-2.18268	-1.0503	-14.5532	-2.89156	55.2745
ROMIDEPSIN	ARSENIC TRIOXIDE	-2.2072	2.23116	6.3874	0.179373	44.815
TRETINOIN	ROMIDEPSIN	-2.21479	0.31365	-11.545	1.42297	23.4255
ROMIDEPSIN	DASATINIB	-2.25449	-0.111256	-0.712813	-2.97743	67.5515
ROMIDEPSIN	ERLOTINIB HYDROCHLORIDE	-2.25743	0.525104	-3.40173	-2.11229	16.068
ROMIDEPSIN	ARSENIC TRIOXIDE	-2.27373	1.91659	34.5301	-2.56356	68.6595
ROMIDEPSIN	SORAFENIB	-2.29236	-2.95613	0.0968925	-3.77167	1.2595
TAMOXIFEN CITRATE	ROMIDEPSIN	-2.36753	-3.28261	-23.0438	-3.65454	24.1225
ROMIDEPSIN	ARSENIC TRIOXIDE	-2.38451	1.60082	3.26754	-0.493605	30.476
TRETINOIN	ROMIDEPSIN	-2.42904	-4.30151	-14.6607	-6.72153	64.14
ROMIDEPSIN	DASATINIB	-2.46615	-1.88304	-1.69772	-2.28888	28.906
NILOTINIB	ROMIDEPSIN	-2.48165	-0.438867	-11.5381	-1.36764	38.5455
NILOTINIB	ROMIDEPSIN	-2.49143	-3.23765	-2.05834	-3.31098	0.39
ROMIDEPSIN	SUNITINIB	-2.50314	-2.66024	1.04234	-6.87109	74.9835
TRETINOIN	ROMIDEPSIN	-2.52409	-2.21429	-42.4638	-1.91864	18.9755
ROMIDEPSIN	DASATINIB	-2.53899	-1.25531	-0.935286	-1.2624	33.682
ROMIDEPSIN	ARSENIC TRIOXIDE	-2.56177	-1.09168	27.1696	-2.80699	28
ROMIDEPSIN	SUNITINIB	-2.56189	-1.82457	-2.06949	-3.4188	71.925
TRETINOIN	ROMIDEPSIN	-2.56681	-1.22271	-9.72718	-1.20303	36.634
ROMIDEPSIN	ARSENIC TRIOXIDE	-2.58065	-3.13107	12.5571	-3.24178	26.7795
ROMIDEPSIN	SORAFENIB	-2.69466	-4.73974	-52.6789	-2.22087	33.9005
ROMIDEPSIN	ARSENIC TRIOXIDE	-2.72019	-4.93276	27.0104	-5.42476	55.19
ROMIDEPSIN	LAPATINIB	-2.72903	-2.79781	-21.5167	-3.84181	23.0725
ROMIDEPSIN	ARSENIC TRIOXIDE	-2.85735	-4.75716	9.75595	-5.67564	19.87
ROMIDEPSIN	SUNITINIB	-2.95025	-1.50316	-13.1263	-3.02962	49.5855
ROMIDEPSIN	ERLOTINIB HYDROCHLORIDE	-2.99475	-0.939106	-0.909036	-3.17311	65.5725
ROMIDEPSIN	SUNITINIB	-2.99971	-3.19889	-19.0074	-3.29434	22.9255
ROMIDEPSIN	DASATINIB	-3.04175	-1.29126	-1.54374	-4.44507	56.3565
ROMIDEPSIN	DASATINIB	-3.12096	-0.443486	-1.28393	-4.5077	66.679
ROMIDEPSIN	SORAFENIB	-3.15059	-1.60503	-1.37306	-2.50245	55.39
ROMIDEPSIN	LAPATINIB	-3.15109	-3.21914	-42.7388	-4.09799	62.069
IMATINIB	ROMIDEPSIN	-3.17377	-1.69511	-48.4615	-0.604288	42.916
ROMIDEPSIN	LAPATINIB	-3.25095	-2.59605	-2.28576	-1.96032	9.7725
ROMIDEPSIN	ARSENIC TRIOXIDE	-3.25607	-4.24934	-16.2461	-5.6085	47.054
ROMIDEPSIN	ARSENIC TRIOXIDE	-3.32598	-3.59579	0.42705	-6.27375	81.259
ROMIDEPSIN	ARSENIC TRIOXIDE	-3.40226	-3.53214	-3.01411	-4.35775	15.0285
IMATINIB	PARGYLINE	-3.43367	-4.30859	-3.46144	-5.58796	88.5716
EVEROLIMUS	PARGYLINE	-3.43649	1.96141	1.9276	-3.43649	71.9216
TRETINOIN	ROMIDEPSIN	-3.48982	-3.05968	-22.8612	-5.80785	59.6475
ROMIDEPSIN	DASATINIB	-3.50573	-2.8895	-12.7009	-4.29852	13.4615
TRETINOIN	ROMIDEPSIN	-3.62091	-4.1113	-15.023	-4.51866	29
ROMIDEPSIN	ARSENIC TRIOXIDE	-3.63533	0.873054	9.3003	-2.47743	25.1985
ROMIDEPSIN	SUNITINIB	-3.64342	-2.21896	-11.9752	-2.89166	13.5505
ROMIDEPSIN	DASATINIB	-3.6776	-4.29577	-2.70672	-4.79997	52.813
IMATINIB	ROMIDEPSIN	-3.73956	-6.96139	-18.4134	-7.71222	25.239
ROMIDEPSIN	LAPATINIB	-3.7401	-2.58575	-23.9528	-5.1205	60.862
ROMIDEPSIN	ARSENIC TRIOXIDE	-3.75547	-5.83691	-5.70943	-5.97	61.0805
ROMIDEPSIN	DASATINIB	-3.77294	-3.30577	-2.92699	-3.90146	67.392
ROMIDEPSIN	SUNITINIB	-3.87021	-8.23912	-36.4921	-8.67475	17.426
TRETINOIN	ROMIDEPSIN	-3.88171	-3.91082	-31.2984	-4.06732	25.6535
ROMIDEPSIN	LAPATINIB	-3.89662	-9.11987	-32.338	-10.1865	50.0015
NILOTINIB	ROMIDEPSIN	-3.94635	-1.90709	-2.25338	-3.13225	4.442
TRETINOIN	ROMIDEPSIN	-4.00598	-1.89469	-67.1421	-2.67143	53.9515
ROMIDEPSIN	SUNITINIB	-4.03683	-4.11782	-147.144	-4.52284	58.2175
TRETINOIN	ROMIDEPSIN	-4.04923	-1.72012	-12.8589	-2.29301	34.2565
ROMIDEPSIN	LAPATINIB	-4.06862	-4.24648	-19.406	-5.59492	71.062
ROMIDEPSIN	SORAFENIB	-4.10413	-4.23227	-209.182	-5.65557	46.0525
PARGYLINE	ETHINYL ESTRADIOL	-4.11016	11.1514	11.1514	-4.11016	30.1416
NILOTINIB	ROMIDEPSIN	-4.2743	-3.54111	5.78608	-5.26963	23.794
ROMIDEPSIN	SUNITINIB	-4.35057	-3.09882	6.23995	-4.31579	28.122
ROMIDEPSIN	LAPATINIB	-4.47504	-7.84256	-27.797	-5.63219	27.0195
NILOTINIB	ROMIDEPSIN	-4.48594	-5.61088	-41.8904	-6.24996	3.6445
ROMIDEPSIN	LAPATINIB	-4.52009	-2.0834	-63.5668	-3.58406	64.934
ROMIDEPSIN	DASATINIB	-4.74225	-8.81603	-49.4317	-7.43853	25.318
ROMIDEPSIN	LAPATINIB	-4.75139	-4.49911	-3.30173	-7.92803	64.504
ROMIDEPSIN	SUNITINIB	-4.78971	-8.51655	-55.927	-8.7122	0.128
NILOTINIB	ROMIDEPSIN	-4.80189	-2.07345	-51.3966	-1.94163	50.738
IMATINIB	ROMIDEPSIN	-4.89023	-4.04114	-13.7063	-4.13742	34.414
TRETINOIN	ROMIDEPSIN	-5.06609	-2.72336	-3.36088	-5.17532	8.103
IMATINIB	ROMIDEPSIN	-5.08112	-2.41536	-30.3409	-5.74286	37.728
ROMIDEPSIN	SORAFENIB	-5.12732	-2.57831	-15.2654	-3.98592	19.225
ROMIDEPSIN	ARSENIC TRIOXIDE	-5.12746	-5.16067	7.66523	-5.96532	27.9415
IMATINIB	ROMIDEPSIN	-5.18125	-2.21333	-4.96105	-3.73192	46.468
TRETINOIN	ROMIDEPSIN	-5.21198	-3.6653	-10.4677	-5.49128	40.2435
ROMIDEPSIN	DASATINIB	-5.22431	-5.04775	-9.12734	-5.75148	57.5205
ROMIDEPSIN	SUNITINIB	-5.34339	-10.8167	-30.232	-9.92648	8.2795
NILOTINIB	ROMIDEPSIN	-5.38273	-5.53992	-25.1385	-5.66442	47.1725
ROMIDEPSIN	SUNITINIB	-5.46045	-4.06244	-2.40255	-6.73345	59.479
ROMIDEPSIN	LAPATINIB	-5.52016	-5.61298	-27.7809	-5.80416	59.302
ROMIDEPSIN	SORAFENIB	-5.55765	-3.55785	-6.99325	-5.57763	11.607
ROMIDEPSIN	LAPATINIB	-5.87888	-1.87471	-1.62681	-4.5874	56.4935
ROMIDEPSIN	SUNITINIB	-6.18891	-12.4245	-43.3748	-13.5348	10.9945
NILOTINIB	ROMIDEPSIN	-6.23942	-5.99232	-15.4395	-8.26749	40.874
ROMIDEPSIN	SUNITINIB	-6.29754	-4.58985	-5.18706	-5.48649	31.2145
ROMIDEPSIN	SORAFENIB	-6.30993	-6.65602	-23.3608	-7.25692	49.387
ROMIDEPSIN	SORAFENIB	-6.50862	-2.16498	-5.4487	-4.74279	61.4835
NILOTINIB	ROMIDEPSIN	-6.60961	-5.66796	-7.0143	-7.07655	53.412
ROMIDEPSIN	DASATINIB	-6.63198	-7.16577	-14.1702	-7.23492	11.3085
ROMIDEPSIN	DASATINIB	-6.84054	-6.9656	-8.08445	-7.72565	41.164
ROMIDEPSIN	ARSENIC TRIOXIDE	-7.03538	-6.88843	-20.5549	-7.18509	45.1255
ROMIDEPSIN	DASATINIB	-7.07631	-7.70709	-25.7256	-8.9504	70.273
NILOTINIB	ROMIDEPSIN	-7.27647	-3.11217	-11.4816	-5.40068	35.9795
ROMIDEPSIN	SUNITINIB	-7.3433	-13.16	-35.0089	-14.2622	3.3885
NILOTINIB	ROMIDEPSIN	-7.40297	-7.2514	-35.5886	-6.54936	32.323
TRANYLCYPROMINE	SORAFENIB	-7.47608	4.10141	4.09453	-7.47608	21.8116
ETHINYL ESTRADIOL	VALPROIC ACID	-7.64209	3.92141	3.90156	-7.64209	23.7816
ROMIDEPSIN	LAPATINIB	-7.89956	-5.62688	-5.33985	-6.9086	56.3275
ROMIDEPSIN	ARSENIC TRIOXIDE	-8.10113	-7.2197	1.10303	-7.09428	41.576
ROMIDEPSIN	ERLOTINIB HYDROCHLORIDE	-8.11626	-7.30911	-6.9628	-8.51285	64.9505
ROMIDEPSIN	SORAFENIB	-8.36223	-4.44513	-1.39196	-8.70717	5.155
ROMIDEPSIN	ARSENIC TRIOXIDE	-8.85289	-7.20904	-7.43799	-7.79236	23.552
ROMIDEPSIN	SUNITINIB	-8.93328	-8.31345	-19.0682	-7.76482	32.3245
ROMIDEPSIN	SUNITINIB	-9.65513	-8.78999	-19.2031	-9.98544	30.2485
TRETINOIN	ROMIDEPSIN	-9.73255	-2.34814	-3.88369	-7.70803	58.1065
TRANYLCYPROMINE	ETHINYL ESTRADIOL	-11.0413	3.33243	3.31362	-11.0413	22.1716
ROMIDEPSIN	ARSENIC TRIOXIDE	-12.2783	-11.0214	-16.2666	-13.1178	57.4095
ROMIDEPSIN	LAPATINIB	-12.3102	-11.9258	-11.5717	-11.8918	28.793
SORAFENIB	VALPROIC ACID	-12.5823	-3.44859	-3.31098	-15.7004	11.6416
ROMIDEPSIN	SUNITINIB	-12.6555	-13.9842	-37.6942	-13.556	12.599
SORAFENIB	PARGYLINE	-13.1324	-1.50757	-1.3437	-13.8862	16.4616
TRANYLCYPROMINE	SUNITINIB	-13.9577	-2.21757	-1.96724	-15.0665	25.2316
HYDRALAZINE	FLUTAMIDE	-15.0649	4.97141	4.957	-15.0649	39.4916
VALPROIC ACID	SUNITINIB	-17.2087	-14.6076	-14.3572	-25.8168	12.8416
PARGYLINE	SUNITINIB	-18.007	-10.2976	-10.0472	-24.0751	17.1516
TAMOXIFEN	TRANYLCYPROMINE	-18.0847	-17.7886	-17.5219	-29.5978	11.4516
FLUTAMIDE	TRANYLCYPROMINE	-18.8775	-19.1286	-18.8402	-30.5406	12.4916
FLUTAMIDE	PARGYLINE	-19.1128	-17.5486	10.5793	-29.8359	14.0716
SUNITINIB	HYDRALAZINE	-21.4474	-6.66757	13.3006	-25.6005	26.8316
HYDRALAZINE	SORAFENIB	-26.691	-17.4786	-17.1638	-26.6911	17.0416
IMATINIB	VALPROIC ACID	-30.5867	-59.1186	-58.2714	-60.1459	33.7616
GEFITINIB	VALPROIC ACID	-36.1899	-67.2486	-66.4987	-69.8141	14.9716
TRANYLCYPROMINE	GEFITINIB	-70.648	-71.1476	-70.407	-74.4772	10.0516
TRANYLCYPROMINE	IMATINIB	-78.26	-79.4876	-78.6497	-80.9293	12.3716
