# Supplementary material for: Dual-Parameter Profiling of Synergistic and Antagonistic Epigenetic-Targeted Drug Combinations in Cancer: An In Silico Framework for Therapeutic Index Optimization
Source: Research Square preprint supplement (doi:10.21203/rs.3.rs-7999417/v1), 2025-12-03
Supplement: Supplementary file 2 [file 925233d4d7afc6d6462cdac3.xlsx]

## Sheet: Sheet1
		Table S1. List of targeted therapy drugs and epigenetic drugs and drug-response data availability
Targeted drug ID	Targeted drug	Targeted drug	Targeted drug	data availability				Epigenetic drugs types	epigenetic drugs			epigenetic drugs		epigenetics drug data availability
D00094	Tretinoin (JAN/USP/INN)	Tretinoin	TRETINOIN	Y				DNMTi	Decitabine			DECITABINE		Y
D00327	Fluoxymesterone (JAN/USP/INN)	Fluoxymesterone	FLUOXYMESTERONE	N				DNMTi	azacitidine			AZACITIDINE		Y
D00408	Methyltestosterone (JP18/USP/INN)	Methyltestosterone	METHYLTESTOSTERONE	N				DNMTi	EGCG			EGCG		N
D00554	Ethinyl estradiol (USP)	Ethinyl estradiol	ETHINYL ESTRADIOL	Y				DNMTi	zebularine			ZEBULARINE		Y
D00586	Flutamide (JP18/USP/INN)	Flutamide	FLUTAMIDE	Y				DNMTi	hydralazine			HYDRALAZINE		N
D00745	Interferon alfa-2a (USAN/INN)	Interferon alfa-2a	INTERFERON ALFA-2A	N				DNMTi	procainamide			PROCAINAMIDE		N
D00747	Interferon gamma-1b (USAN/INN)	Interferon gamma-1b	INTERFERON GAMMA-1B	N
D00748	Aldesleukin (USAN/INN)	Aldesleukin	ALDESLEUKIN	N				HATi	C646			C646		N
D00753	Sirolimus (JAN/USAN/INN)	Sirolimus	SIROLIMUS	Y				HATi	curcumin			CURCUMIN		Y
D00958	Testosterone enanthate (JP18/USP)	Testosterone enanthate	TESTOSTERONE ENANTHATE	N
D00961	Bicalutamide (JAN/USP/INN)	Bicalutamide	BICALUTAMIDE	Y				HDACi	Vorinostat			VORINOSTAT		Y
D00965	Nilutamide (USAN/INN)	Nilutamide	NILUTAMIDE	Y				HDACi	givinostat			GIVINOSTAT		Y
D00966	Tamoxifen citrate (JP18/USP)	Tamoxifen citrate	TAMOXIFEN CITRATE	Y				HDACi	panobinostat			PANOBINOSTAT		N
D00967	Toremifene citrate (JAN/USAN)	Toremifene citrate	TOREMIFENE CITRATE	Y				HDACi	TSA			TSA		N
D01161	Fulvestrant (JAN/USP/INN)	Fulvestrant	FULVESTRANT	Y				HDACi	belinostat			BELINOSTAT		Y
D01441	Imatinib mesylate (USAN)	Imatinib mesylate	IMATINIB MESYLATE	Y				HDACi	entinostat			ENTINOSTAT		Y
D01534	Dromostanolone propionate (USAN)	Dromostanolone propionate	DROMOSTANOLONE PROPIONATE	N				HDACi	CG-1521			CG-1521		N
D01977	Gefitinib (JP18/USAN/INN)	Gefitinib	GEFITINIB	N				HDACi	romidepsin			ROMIDEPSIN		Y
D02106	Arsenic trioxide (JP18/USAN)	Arsenic trioxide	ARSENIC TRIOXIDE	N				HDACi	ITF-A			ITF-A		N
D02714	Everolimus (JAN/USAN/INN)	Everolimus	EVEROLIMUS	Y				HDACi	ITF-B			ITF-B		N
D02745	Interferon alfa-2b (USAN)	Interferon alfa-2b	INTERFERON ALFA-2B	N				HDACi	valproic acid			VALPROIC ACID		Y
D02748	Peginterferon alfa-2b (USAN/INN)	Peginterferon alfa-2b	PEGINTERFERON ALFA-2B	N				HDACi	OSU-HDAC-44			OSU-HDAC-44		N
D02815	Alitretinoin (USAN)	Alitretinoin	ALITRETINOIN	N				HDACi	HC-toxin			HC-TOXIN		N
D02970	Aprinocarsen sodium (USAN)	Aprinocarsen sodium	APRINOCARSEN SODIUM	N				HDACi	magnesium valproate			MAGNESIUM VALPROATE		N
D03061	Batimastat (USAN/INN)	Batimastat	BATIMASTAT	Y				HDACi	plitidepsin			PLITIDEPSIN		N
D03106	Bexarotene (JAN/USAN/INN)	Bexarotene	BEXAROTENE	Y				HDACi	tasquinimod			TASQUINIMOD		N
D03218	Axitinib (JAN/USAN)	Axitinib	AXITINIB	Y				HDACi	sodium butyrate			SODIUM BUTYRATE		N
D03235	Filgrastim (USP/INN)	Filgrastim	FILGRASTIM	N				HDACi	mocetinostat			MOCETINOSTAT		Y
D03247	Lenograstim (USAN/INN)	Lenograstim	LENOGRASTIM	N				HDACi	carbamazepine			CARBAMAZEPINE		Y
D03252	Bosutinib (USAN)	Bosutinib	BOSUTINIB	Y				HDACi	SB939			SB939		N
D03257	Trastuzumab (USAN/INN)	Trastuzumab	TRASTUZUMAB	N				HDACi	CHR-2845			CHR-2845		N
D03305	Interferon alfa (NAMALWA) (JP18)	Interferon alfa	INTERFERON ALFA	N				HDACi	CHR-3996			CHR-3996		N
D03350	Canertinib dihydrochloride (USAN)	Canertinib dihydrochloride	CANERTINIB DIHYDROCHLORIDE	N				HDACi	JNJ-26481585			JNJ-26481585		N
D03357	Interferon gamma-1a (genetical recombination) (JAN)	Interferon gamma-1a	INTERFERON GAMMA-1A	N				HDACi	sodium phenylbutyrate			SODIUM PHENYLBUTYRATE		Y
D03455	Cetuximab (USAN/INN)	Cetuximab	CETUXIMAB	N				HDACi	pivanex			PIVANEX		N
D03658	Dasatinib (JAN/INN)	Dasatinib	DASATINIB	N				HDACi	resveratrol			RESVERATROL		Y
D03682	Denileukin diftitox (USAN/INN)	Denileukin diftitox	DENILEUKIN DIFTITOX	N				HDACi	abexinostat			ABEXINOSTAT		N
D03800	Rebimastat (USAN/INN)	Rebimastat	REBIMASTAT	N				HDACi	resminostat			RESMINOSTAT		Y
D03802	Tanomastat (USAN/INN)	Tanomastat	TANOMASTAT	N				HDACi	dacinostat			DACINOSTAT		Y
D04014	Enzastaurin hydrochloride (JAN/USAN)	Enzastaurin hydrochloride	ENZASTAURIN HYDROCHLORIDE	N				HDACi	droxinostat			DROXINOSTAT		Y
D04023	Erlotinib hydrochloride (JAN/USAN)	Erlotinib hydrochloride	ERLOTINIB HYDROCHLORIDE	Y
D04024	Lapatinib ditosylate (USAN)	Lapatinib ditosylate	LAPATINIB DITOSYLATE	Y				HDMi	Pargyline			PARGYLINE		N
D04025	Mubritinib (USAN/INN)	Mubritinib	MUBRITINIB	Y				HDMi	clorgyline			CLORGYLINE		N
D04162	Fenretinide (USAN/INN)	Fenretinide	FENRETINIDE	N				HDMi	bizine			BIZINE		N
D04696	Lestaurtinib (USAN/INN)	Lestaurtinib	LESTAURTINIB	Y				HDMi	GSK2879552			GSK2879552		N
D04862	Masoprocol (USAN/INN)	Masoprocol	MASOPROCOL	N				HDMi	GSK-J4			GSK-J4		N
D05029	Midostaurin (JAN/USAN/INN)	Midostaurin	MIDOSTAURIN	Y				HDMi	KDM5-C70			KDM5-C70		N
D05350	Panitumumab (USAN/INN)	Panitumumab	PANITUMUMAB	N				HDMi	JIB-04			JIB-04		Y
D05380	Pazopanib hydrochloride (JAN/USAN)	Pazopanib hydrochloride	PAZOPANIB HYDROCHLORIDE	Y				HDMi	tranylcypromine			TRANYLCYPROMINE		N
D05386	Pegaptanib sodium (JAN/USAN)	Pegaptanib sodium	PEGAPTANIB SODIUM	N
D05399	Pelitinib (USAN/INN)	Pelitinib	PELITINIB	Y				HMTi	EPZ-6438			EPZ-6438		N
D05446	Pertuzumab (USAN/INN)	Pertuzumab	PERTUZUMAB	N				HMTi	GSK126			GSK126		N
D05803	Sargramostim (USP/INN)	Sargramostim	SARGRAMOSTIM	N				HMTi	CPI360			CPI360		N
D05819	Semaxanib (USAN/INN)	Semaxanib	SEMAXANIB	Y				HMTi	DZNep			DZNEP		N
D06005	Tandutinib (USAN/INN)	Tandutinib	TANDUTINIB	Y				HMTi	GSK343			GSK343		N
D06068	Temsirolimus (JAN/USAN/INN)	Temsirolimus	TEMSIROLIMUS	Y				HMTi	EI1			EI1		N
D06272	Sorafenib tosylate (USAN)	Sorafenib tosylate	SORAFENIB TOSYLATE	Y				HMTi	BIX-01294			BIX-01294		N
D06285	Vatalanib (USAN/INN)	Vatalanib	VATALANIB	Y				HMTi	UNC0638			UNC0638		Y
D06320	Vorinostat (JAN/USAN)	Vorinostat	VORINOSTAT	Y				HMTi	EPZ004777			EPZ004777		?
D06402	Sunitinib malate (JAN/USAN)	Sunitinib malate	SUNITINIB MALATE	N				HMTi	UNC0224			UNC0224		N
D06407	Vandetanib (JAN/USAN/INN)	Vandetanib	VANDETANIB	Y
D06409	Bevacizumab (USAN)	Bevacizumab	BEVACIZUMAB	N				PAHi	JQ1			JQ1		Y
D06413	Nilotinib hydrochloride hydrate (JAN)	Nilotinib hydrochloride hydrate	NILOTINIB HYDROCHLORIDE HYDRATE	N				PAHi	CPI203			CPI203		N
D06414	Dasatinib (USAN)	Dasatinib	DASATINIB	Y				PAHi	RVX-208			RVX-208		N
D06554	Alvespimycin hydrochloride (USAN)	Alvespimycin hydrochloride	ALVESPIMYCIN HYDROCHLORIDE	N				PAHi	I-BET151			I-BET151		Y
D06563	Belagenpumatucel-L (USAN)	Belagenpumatucel-L	BELAGENPUMATUCEL-L	N				PAHi	I-BET762			I-BET762		N
D06610	Lapuleucel-T (USAN)	Lapuleucel-T	LAPULEUCEL-T	N				PAHi	i-BET-726			I-BET-726		N
D06637	Romidepsin (JAN/USAN/INN)	Romidepsin	ROMIDEPSIN	Y
D06678	Motesanib (USAN)	Motesanib	MOTESANIB	N				PMHi	UNC669			UNC669		N
D06889	Pegfilgrastim (USAN/INN)	Pegfilgrastim	PEGFILGRASTIM	N				PMHi	UNC1215			UNC1215		N
D07434	Polyestradiol phosphate (INN)	Polyestradiol phosphate	POLYESTRADIOL PHOSPHATE	N
D07741	Zibotentan (JAN/USAN/INN)	Zibotentan	ZIBOTENTAN	Y
D07907	Erlotinib (INN)	Erlotinib	ERLOTINIB	Y
D08066	Imatinib (INN)	Imatinib	IMATINIB	Y
D08108	Lapatinib (INN)	Lapatinib	LAPATINIB	Y
D08524	Sorafenib (USAN/INN)	Sorafenib	SORAFENIB	Y
D08552	Sunitinib (INN)	Sunitinib	SUNITINIB	Y
D08559	Tamoxifen (INN)	Tamoxifen	TAMOXIFEN	Y
D08805	Interferon gamma-n1 (JAN)	Interferon gamma-n1	INTERFERON GAMMA-N1	N
D08870	Belinostat (USAN/INN)	Belinostat	BELINOSTAT	Y
D08881	Cediranib (USAN/INN)	Cediranib	CEDIRANIB	Y
D08883	Cediranib maleate (JAN/USAN)	Cediranib maleate	CEDIRANIB MALEATE	N
D08900	Ridaforolimus (JAN/USAN)	Ridaforolimus	RIDAFOROLIMUS	Y
D08917	Ezatiostat hydrochloride (USAN)	Ezatiostat hydrochloride	EZATIOSTAT HYDROCHLORIDE	N
D08947	Motesanib diphosphate (USAN)	Motesanib diphosphate	MOTESANIB DIPHOSPHATE	Y
D08950	Neratinib (USAN/INN)	Neratinib	NERATINIB	Y
D08953	Nilotinib (USAN/INN)	Nilotinib	NILOTINIB	Y
D08956	Omacetaxine mepesuccinate (USAN)	Omacetaxine mepesuccinate	OMACETAXINE MEPESUCCINATE	N
D08971	Plerixafor (JAN/USAN/INN)	Plerixafor	PLERIXAFOR	N
D09328	Cixutumumab (USAN)	Cixutumumab	CIXUTUMUMAB	N
D09338	Entinostat (JAN/USAN/INN)	Entinostat	ENTINOSTAT	N
D09357	Mocetinostat dihydrobromide (USAN)	Mocetinostat dihydrobromide	MOCETINOSTAT DIHYDROBROMIDE	N
D09574	Aflibercept (USAN/INN)	Aflibercept	AFLIBERCEPT	N
D09604	Dinaciclib (USAN/INN)	Dinaciclib	DINACICLIB	Y
D09629	Imetelstat (USAN/INN)	Imetelstat	IMETELSTAT	N
D09630	Imetelstat sodium (USAN)	Imetelstat sodium	IMETELSTAT SODIUM	N
D09635	Linifanib (USAN/INN)	Linifanib	LINIFANIB	Y
D09641	Mocetinostat (USAN/INN)	Mocetinostat	MOCETINOSTAT	Y
D09659	Rilotumumab (USAN/INN)	Rilotumumab	RILOTUMUMAB	N
D09660	Rindopepimut (USAN)	Rindopepimut	RINDOPEPIMUT	N
D09683	Tivozanib (USAN/INN)	Tivozanib	TIVOZANIB	Y
D09689	Varlitinib (USAN/INN)	Varlitinib	VARLITINIB	Y
D09690	Varlitinib tosylate (USAN)	Varlitinib tosylate	VARLITINIB TOSYLATE	N
D09724	Afatinib (USAN/INN)	Afatinib	AFATINIB	Y
D09728	Bosutinib hydrate (JAN)	Bosutinib hydrate	BOSUTINIB HYDRATE	N
D09731	Crizotinib (JAN/USAN/INN)	Crizotinib	CRIZOTINIB	Y
D09733	Afatinib dimaleate (USAN)	Afatinib dimaleate	AFATINIB DIMALEATE	N
D09746	Dalotuzumab (USAN)	Dalotuzumab	DALOTUZUMAB	N
D09864	Amuvatinib (USAN/INN)	Amuvatinib	AMUVATINIB	Y
D09865	Amuvatinib hydrochloride (USAN)	Amuvatinib hydrochloride	AMUVATINIB HYDROCHLORIDE	N
D09908	Ganitumab (USAN/INN)	Ganitumab	GANITUMAB	N
D09909	Gataparsen (USAN/INN)	Gataparsen	GATAPARSEN	N
D09910	Gataparsen sodium (USAN)	Gataparsen sodium	GATAPARSEN SODIUM	N
D09919	Lenvatinib (USAN/INN)	Lenvatinib	LENVATINIB	Y
D09920	Lenvatinib mesylate (USAN)	Lenvatinib mesylate	LENVATINIB MESYLATE	N
D09939	Olaratumab (USAN/INN)	Olaratumab	OLARATUMAB	N
D09941	Onartuzumab (USAN/INN)	Onartuzumab	ONARTUZUMAB	N
D09950	Ponatinib (USAN/INN)	Ponatinib	PONATINIB	Y
D09951	Ponatinib hydrochloride (JAN/USAN)	Ponatinib hydrochloride	PONATINIB HYDROCHLORIDE	N
D09955	Quizartinib (USAN/INN)	Quizartinib	QUIZARTINIB	Y
D09956	Quizartinib dihydrochloride (USAN)	Quizartinib dihydrochloride	QUIZARTINIB DIHYDROCHLORIDE	N
D09959	Ruxolitinib (USAN/INN)	Ruxolitinib	RUXOLITINIB	Y
D09960	Ruxolitinib phosphate (JAN/USAN)	Ruxolitinib phosphate	RUXOLITINIB PHOSPHATE	N
D09980	Trastuzumab emtansine (USAN/INN)	Trastuzumab emtansine	TRASTUZUMAB EMTANSINE	N
D09992	Vismodegib (USAN/INN)	Vismodegib	VISMODEGIB	Y
D09996	Vemurafenib (JAN/USAN/INN)	Vemurafenib	VEMURAFENIB	Y
D10019	Panobinostat lactate (JAN)	Panobinostat lactate	PANOBINOSTAT LACTATE	N
D10031	Zalutumumab (USAN/INN)	Zalutumumab	ZALUTUMUMAB	N
D10060	Abexinostat (USAN)	Abexinostat	ABEXINOSTAT	N
D10062	Cabozantinib (USAN)	Cabozantinib	CABOZANTINIB	Y
D10064	Dabrafenib (USAN)	Dabrafenib	DABRAFENIB	Y
D10076	Olcorolimus (USAN)	Olcorolimus	OLCOROLIMUS	N
D10084	Abexinostat hydrochloride (USAN)	Abexinostat hydrochloride	ABEXINOSTAT HYDROCHLORIDE	N
D10095	Cabozantinib s-malate (USAN)	Cabozantinib s-malate	CABOZANTINIB S-MALATE	N
D10102	Crenolanib (USAN)	Crenolanib	CRENOLANIB	Y
D10103	Crenolanib besylate (USAN)	Crenolanib besylate	CRENOLANIB BESYLATE	N
D10104	Dabrafenib mesylate (USAN)	Dabrafenib mesylate	DABRAFENIB MESYLATE	N
D10119	Sonidegib (USAN/INN)	Sonidegib	SONIDEGIB	Y
D10123	Ficlatuzumab (USAN)	Ficlatuzumab	FICLATUZUMAB	N
D10137	Regorafenib hydrate (JAN)	Regorafenib hydrate	REGORAFENIB HYDRATE	N
D10138	Regorafenib (USAN/INN)	Regorafenib	REGORAFENIB	Y
D10164	Sepantronium bromide (JAN/USAN)	Sepantronium bromide	SEPANTRONIUM BROMIDE	Y
D10173	Tivantinib (JAN/USAN/INN)	Tivantinib	TIVANTINIB	Y
D10175	Trametinib (USAN)	Trametinib	TRAMETINIB	Y
D10176	Trametinib dimethyl sulfoxide (JAN/USAN)	Trametinib dimethyl sulfoxide	TRAMETINIB DIMETHYL SULFOXIDE	N
D10189	Pictilisib (USAN)	Pictilisib	PICTILISIB	Y
D10190	Tivozanib hydrochloride (USAN)	Tivozanib hydrochloride	TIVOZANIB HYDROCHLORIDE	N
D10218	Enzalutamide (JAN/USAN)	Enzalutamide	ENZALUTAMIDE	Y
D10224	Golvatinib (USAN)	Golvatinib	GOLVATINIB	Y
D10229	Masitinib (INN)	Masitinib	MASITINIB	Y
D10242	Lipegfilgrastim (USAN)	Lipegfilgrastim	LIPEGFILGRASTIM	N
D10319	Panobinostat (USAN/INN)	Panobinostat	PANOBINOSTAT	N
D10321	Quisinostat (USAN/INN)	Quisinostat	QUISINOSTAT	Y
D10322	Quisinostat hydrochloride (USAN)	Quisinostat hydrochloride	QUISINOSTAT HYDROCHLORIDE	N
D10324	Patidegib (USAN)	Patidegib	PATIDEGIB	N
D10325	Patidegib hydrochloride (USAN)	Patidegib hydrochloride	PATIDEGIB HYDROCHLORIDE	N
D10334	Rebastinib (USAN)	Rebastinib	REBASTINIB	Y
D10372	Palbociclib (JAN/USAN)	Palbociclib	PALBOCICLIB	Y
D10381	Afuresertib (USAN)	Afuresertib	AFURESERTIB	N
D10382	Afuresertib hydrochloride (USAN)	Afuresertib hydrochloride	AFURESERTIB HYDROCHLORIDE	N
D10396	Nintedanib esylate (USAN)	Nintedanib esylate	NINTEDANIB ESYLATE	N
D10399	Rebastinib Tosylate (USAN)	Rebastinib Tosylate	REBASTINIB TOSYLATE	N
D10405	Cobimetinib (USAN/INN)	Cobimetinib	COBIMETINIB	N
D10410	Vantictumab (USAN)	Vantictumab	VANTICTUMAB	N
D10423	Ilorasertib (USAN)	Ilorasertib	ILORASERTIB	N
D10426	Pimasertib (USAN/INN)	Pimasertib	PIMASERTIB	Y
D10437	Galunisertib (USAN)	Galunisertib	GALUNISERTIB	Y
D10450	Alectinib hydrochloride (JAN)	Alectinib hydrochloride	ALECTINIB HYDROCHLORIDE	N
D10464	Firtecan pegol (USAN/INN)	Firtecan pegol	FIRTECAN PEGOL	N
D10465	Golvatinib tartrate (USAN)	Golvatinib tartrate	GOLVATINIB TARTRATE	N
D10481	Nintedanib (USAN/INN)	Nintedanib	NINTEDANIB	N
D10486	Pimasertib hydrochloride (USAN)	Pimasertib hydrochloride	PIMASERTIB HYDROCHLORIDE	N
D10542	Alectinib (USAN/INN)	Alectinib	ALECTINIB	Y
D10543	Apitolisib (USAN/INN)	Apitolisib	APITOLISIB	Y
D10551	Ceritinib (JAN/USAN/INN)	Ceritinib	CERITINIB	Y
D10552	Dactolisib (USAN/INN)	Dactolisib	DACTOLISIB	Y
D10555	Duvelisib (USAN/INN)	Duvelisib	DUVELISIB	Y
D10560	Idelalisib (JAN/USAN/INN)	Idelalisib	IDELALISIB	Y
D10584	Buparlisib (USAN/INN)	Buparlisib	BUPARLISIB	Y
D10604	Binimetinib (JAN/USAN)	Binimetinib	BINIMETINIB	Y
D10609	Buparlisib hydrochloride (JAN/USAN)	Buparlisib hydrochloride	BUPARLISIB HYDROCHLORIDE	N
D10615	Cobimetinib fumarate (USAN)	Cobimetinib fumarate	COBIMETINIB FUMARATE	N
D10616	Dactolisib tosylate (USAN)	Dactolisib tosylate	DACTOLISIB TOSYLATE	N
D10635	Gedatolisib (USAN/INN)	Gedatolisib	GEDATOLISIB	Y
D10636	Glasdegib (USAN/INN)	Glasdegib	GLASDEGIB	N
D10641	Ipatasertib (USAN/INN)	Ipatasertib	IPATASERTIB	Y
D10652	Palbociclib isethionate (USAN)	Palbociclib isethionate	PALBOCICLIB ISETHIONATE	N
D10671	Taladegib (USAN/INN)	Taladegib	TALADEGIB	N
D10679	Venetoclax (JAN/USAN/INN)	Venetoclax	VENETOCLAX	Y
D10688	Abemaciclib (JAN/USAN)	Abemaciclib	ABEMACICLIB	N
D10696	Capmatinib (USAN/INN)	Capmatinib	CAPMATINIB	Y
D10709	Gilteritinib (USAN/INN)	Gilteritinib	GILTERITINIB	N
D10717	Napabucasin (JAN/USAN/INN)	Napabucasin	NAPABUCASIN	N
D10718	Omipalisib (USAN/INN)	Omipalisib	OMIPALISIB	Y
D10729	Sonidegib phosphate (USAN)	Sonidegib phosphate	SONIDEGIB PHOSPHATE	N
D10766	Osimertinib mesylate (USAN)	Osimertinib mesylate	OSIMERTINIB MESYLATE	N
D10797	Copanlisib hydrochloride (USAN)	Copanlisib hydrochloride	COPANLISIB HYDROCHLORIDE	N
D10798	Copanlisib hydrochloride hydrate (JAN)	Copanlisib hydrochloride hydrate	COPANLISIB HYDROCHLORIDE HYDRATE	N
D10800	Gilteritinib fumarate (JAN/USAN)	Gilteritinib fumarate	GILTERITINIB FUMARATE	N
D10858	Rociletinib (USAN/INN)	Rociletinib	ROCILETINIB	Y
D10859	Olmutinib (USAN/INN)	Olmutinib	OLMUTINIB	N
D10866	Brigatinib (JAN/USAN)	Brigatinib	BRIGATINIB	N
D10867	Copanlisib (USAN/INN)	Copanlisib	COPANLISIB	N
D10883	Ribociclib (USAN/INN)	Ribociclib	RIBOCICLIB	N
D10891	Capmatinib hydrochloride (USAN)	Capmatinib hydrochloride	CAPMATINIB HYDROCHLORIDE	N
D10898	Neratinib maleate	Neratinib maleate	NERATINIB MALEATE	N
D10924	Dezapelisib (USAN)	Dezapelisib	DEZAPELISIB	N
D10926	Entrectinib (JAN/USAN/INN)	Entrectinib	ENTRECTINIB	N
D10927	Erdafitinib (USAN/INN)	Erdafitinib	ERDAFITINIB	N
D10958	Naquotinib (USAN/INN)	Naquotinib	NAQUOTINIB	N
D10977	Remetinostat (USAN/INN)	Remetinostat	REMETINOSTAT	N
D10979	Ribociclib succinate (USAN)	Ribociclib succinate	RIBOCICLIB SUCCINATE	N
D10981	Rovalpituzumab tesirine (USAN/INN)	Rovalpituzumab tesirine	ROVALPITUZUMAB TESIRINE	N
D10993	Tucidinostat (JAN/USAN/INN)	Tucidinostat	TUCIDINOSTAT	N
D11011	Alpelisib (JAN/USAN/INN)	Alpelisib	ALPELISIB	Y
D11012	Lorlatinib (JAN/USAN/INN)	Lorlatinib	LORLATINIB	N
D11032	Plitidepsin (INN)	Plitidepsin	PLITIDEPSIN	N
D11038	Ulixertinib (INN)	Ulixertinib	ULIXERTINIB	N
D11040	Apalutamide (JAN/INN)	Apalutamide	APALUTAMIDE	Y
D11045	Darolutamide (JAN/USAN/INN)	Darolutamide	DAROLUTAMIDE	N
D11053	Encorafenib (JAN/USAN/INN)	Encorafenib	ENCORAFENIB	N
D11073	Tepotinib hydrochloride (USAN)	Tepotinib hydrochloride	TEPOTINIB HYDROCHLORIDE	N
D11074	Ipatasertib hydrochloride (JAN)	Ipatasertib hydrochloride	IPATASERTIB HYDROCHLORIDE	N
D11107	Glasdegib maleate (JAN)	Glasdegib maleate	GLASDEGIB MALEATE	N
D11115	Olmutinib hydrochloride (USAN)	Olmutinib hydrochloride	OLMUTINIB HYDROCHLORIDE	N
D11117	Rovalpituzumab (USAN)	Rovalpituzumab	ROVALPITUZUMAB	N
D11125	Modotuximab (USAN/INN)	Modotuximab	MODOTUXIMAB	N
D11126	Navicixizumab (USAN/INN)	Navicixizumab	NAVICIXIZUMAB	N
D11130	Trilaciclib (USAN/INN)	Trilaciclib	TRILACICLIB	N
D11136	Glesatinib (USAN/INN)	Glesatinib	GLESATINIB	N
D11137	Larotrectinib (USAN/INN)	Larotrectinib	LAROTRECTINIB	N
D11138	Larotrectinib sulfate (JAN/USAN)	Larotrectinib sulfate	LAROTRECTINIB SULFATE	N
D11139	Savolitinib (USAN/INN)	Savolitinib	SAVOLITINIB	N
D11140	Sitravatinib (USAN/INN)	Sitravatinib	SITRAVATINIB	N
D11141	Tucatinib (USAN/INN)	Tucatinib	TUCATINIB	N
D11151	Crenigacestat (USAN/INN)	Crenigacestat	CRENIGACESTAT	N
D11182	Tinostamustine (USAN/INN)	Tinostamustine	TINOSTAMUSTINE	N
D11184	Ralaniten (USAN/INN)	Ralaniten	RALANITEN	N
D11185	Ralaniten acetate (USAN)	Ralaniten acetate	RALANITEN ACETATE	N
D11229	Brontictuzumab (USAN/INN)	Brontictuzumab	BRONTICTUZUMAB	N
D11234	Emactuzumab (USAN/INN)	Emactuzumab	EMACTUZUMAB	N
D11251	Icotinib	Icotinib	ICOTINIB	Y
D11264	Brilanestrant (USAN/INN)	Brilanestrant	BRILANESTRANT	N
D11270	Pexidartinib (USAN/INN)	Pexidartinib	PEXIDARTINIB	N
D11271	Pexidartinib hydrochloride (JAN/USAN)	Pexidartinib hydrochloride	PEXIDARTINIB HYDROCHLORIDE	N
D11279	Avapritinib (USAN/INN)	Avapritinib	AVAPRITINIB	N
D11307	Telisotuzumab (USAN)	Telisotuzumab	TELISOTUZUMAB	N
D11323	Umbralisib tosylate (USAN)	Umbralisib tosylate	UMBRALISIB TOSYLATE	N
D11344	Telisotuzumab vedotin (USAN)	Telisotuzumab vedotin	TELISOTUZUMAB VEDOTIN	N
D11346	Ensartinib (USAN)	Ensartinib	ENSARTINIB	N
D11353	Ripretinib (USAN)	Ripretinib	RIPRETINIB	N
D11356	Ensartinib hydrochloride (USAN)	Ensartinib hydrochloride	ENSARTINIB HYDROCHLORIDE	N
D11358	Tagraxofusp (USAN/INN)	Tagraxofusp	TAGRAXOFUSP	N
D11371	Capivasertib (JAN/USAN)	Capivasertib	CAPIVASERTIB	Y
D11403	Asciminib (USAN/INN)	Asciminib	ASCIMINIB	N
D11404	Asciminib hydrochloride (JAN/USAN)	Asciminib hydrochloride	ASCIMINIB HYDROCHLORIDE	N
D11409	Miransertib (USAN/INN)	Miransertib	MIRANSERTIB	N
D11410	Lifirafenib (USAN/INN)	Lifirafenib	LIFIRAFENIB	N
D11411	Lifirafenib maleate (USAN)	Lifirafenib maleate	LIFIRAFENIB MALEATE	N
D11417	Pemigatinib (JAN/USAN/INN)	Pemigatinib	PEMIGATINIB	N
D11430	Nazartinib (USAN/INN)	Nazartinib	NAZARTINIB	N
D11434	Nazartinib mesylate (USAN)	Nazartinib mesylate	NAZARTINIB MESYLATE	N
D11437	Parsaclisib (USAN/INN)	Parsaclisib	PARSACLISIB	N
D11440	Bimiralisib (USAN/INN)	Bimiralisib	BIMIRALISIB	N
D11442	Nanatinostat (USAN)	Nanatinostat	NANATINOSTAT	N
D11454	Repotrectinib (USAN)	Repotrectinib	REPOTRECTINIB	N
D11455	Lerociclib (USAN)	Lerociclib	LEROCICLIB	N
D11461	Derazantinib hydrochloride (USAN)	Derazantinib hydrochloride	DERAZANTINIB HYDROCHLORIDE	N
D11501	Samotolisib (USAN)	Samotolisib	SAMOTOLISIB	N
D11506	Parsaclisib hydrochloride (USAN)	Parsaclisib hydrochloride	PARSACLISIB HYDROCHLORIDE	N
D11508	Miransertib mesylate (USAN)	Miransertib mesylate	MIRANSERTIB MESYLATE	N
D11529	Trastuzumab deruxtecan (USAN/INN)	Trastuzumab deruxtecan	TRASTUZUMAB DERUXTECAN	N
D11541	Sitravatinib malate (USAN)	Sitravatinib malate	SITRAVATINIB MALATE	N
D11589	Infigratinib (USAN/INN)	Infigratinib	INFIGRATINIB	Y
D11599	Zotiraciclib (USAN)	Zotiraciclib	ZOTIRACICLIB	N
D11600	Zotiraciclib citrate (USAN)	Zotiraciclib citrate	ZOTIRACICLIB CITRATE	N
D11642	Dilpacimab (USAN/INN)	Dilpacimab	DILPACIMAB	N
D11658	Duvelisib hydrate (JAN)	Duvelisib hydrate	DUVELISIB HYDRATE	N
D11663	Onatasertib (USAN)	Onatasertib	ONATASERTIB	N
D11669	Bempegaldesleukin (USAN/INN)	Bempegaldesleukin	BEMPEGALDESLEUKIN	N
D11671	Elacestrant (USAN/INN)	Elacestrant	ELACESTRANT	N
D11672	Elacestrant hydrochloride (USAN)	Elacestrant hydrochloride	ELACESTRANT HYDROCHLORIDE	N
D11675	Mirdametinib (USAN)	Mirdametinib	MIRDAMETINIB	N
D11712	Pralsetinib (USAN/INN)	Pralsetinib	PRALSETINIB	N
D11713	Selpercatinib (JAN/USAN/INN)	Selpercatinib	SELPERCATINIB	N
D11717	Tepotinib (USAN/INN)	Tepotinib	TEPOTINIB	N
D11725	Futibatinib (JAN/USAN/INN)	Futibatinib	FUTIBATINIB	N
D11727	Voxtalisib (USAN/INN)	Voxtalisib	VOXTALISIB	Y
D11737	Fisogatinib (USAN/INN)	Fisogatinib	FISOGATINIB	N
D11747	Inbakicept (USAN/INN)	Inbakicept	INBAKICEPT	N
D11762	Lucitanib (USAN/INN)	Lucitanib	LUCITANIB	N
D11763	Merestinib (USAN/INN)	Merestinib	MERESTINIB	N
D11768	Pacritinib (USAN/INN)	Pacritinib	PACRITINIB	Y
D11772	Tesevatinib (USAN/INN)	Tesevatinib	TESEVATINIB	N
D11773	Tesevatinib tosylate (USAN)	Tesevatinib tosylate	TESEVATINIB TOSYLATE	N
D11774	Taselisib (USAN/INN)	Taselisib	TASELISIB	N
D11775	Tarextumab (USAN/INN)	Tarextumab	TAREXTUMAB	N
D11786	Vodobatinib (USAN)	Vodobatinib	VODOBATINIB	N
D11803	Cetuximab sarotalocan (USAN/INN)	Cetuximab sarotalocan	CETUXIMAB SAROTALOCAN	N
D11805	Cetuximab sarotalocan sodium (genetical recombination) (JAN)	Cetuximab sarotalocan sodium	CETUXIMAB SAROTALOCAN SODIUM	N
D11872	Serclutamab (USAN/INN)	Serclutamab	SERCLUTAMAB	N
D11874	Serclutamab talirine (USAN/INN)	Serclutamab talirine	SERCLUTAMAB TALIRINE	N
D11885	Surufatinib (USAN/INN)	Surufatinib	SURUFATINIB	N
D11890	Emvododstat (USAN)	Emvododstat	EMVODODSTAT	N
D11894	Amivantamab (USAN/INN)	Amivantamab	AMIVANTAMAB	N
D11935	Enzastaurin (USAN/INN)	Enzastaurin	ENZASTAURIN	Y
D11942	Inavolisib (USAN/INN)	Inavolisib	INAVOLISIB	N
D11954	Belzutifan (USAN/INN)	Belzutifan	BELZUTIFAN	N
D11969	Mobocertinib succinate (JAN)	Mobocertinib succinate	MOBOCERTINIB SUCCINATE	N
D11980	Lazertinib (USAN)	Lazertinib	LAZERTINIB	N
D11987	Trilaciclib dihydrochloride	Trilaciclib dihydrochloride	TRILACICLIB DIHYDROCHLORIDE	N
D12001	Mobocertinib (USAN/INN)	Mobocertinib	MOBOCERTINIB	N
D12009	Zandelisib (USAN/INN)	Zandelisib	ZANDELISIB	N
D12011	Zanidatamab (USAN/INN)	Zanidatamab	ZANIDATAMAB	N
D12049	Camizestrant (USAN)	Camizestrant	CAMIZESTRANT	N
D12055	Sotorasib (JAN/USAN)	Sotorasib	SOTORASIB	N
D12059	Temuterkib (USAN)	Temuterkib	TEMUTERKIB	N
D12060	Temuterkib mesylate (USAN)	Temuterkib mesylate	TEMUTERKIB MESYLATE	N
D12128	Balixafortide (USAN/INN)	Balixafortide	BALIXAFORTIDE	N
