# Supplementary material for: Dual-Parameter Profiling of Synergistic and Antagonistic Epigenetic-Targeted Drug Combinations in Cancer: An In Silico Framework for Therapeutic Index Optimization
Source: Research Square preprint supplement (doi:10.21203/rs.3.rs-7999417/v1), 2025-12-03
Supplement: Supplementary file 3 [file ae6d02395d1c79474f244285.xlsx]

## Sheet: Sheet1
Table 2 Experimental Dose-Response Data for TRANYLCYPROMINE and IMATINIB Combination
PairIndex	Drug1	Drug2	Conc1	Conc2	Response	ConcUnit
1	IMATINIB	TRANYLCYPROMINE	0	0	-79.49	nM
1	IMATINIB	TRANYLCYPROMINE	0	1.25	-58.76	nM
1	IMATINIB	TRANYLCYPROMINE	0	2.5	-53.9	nM
1	IMATINIB	TRANYLCYPROMINE	0	5	-44.8	nM
1	IMATINIB	TRANYLCYPROMINE	1.25	0	-65.32	nM
1	IMATINIB	TRANYLCYPROMINE	1.25	1.25	-70.21	nM
1	IMATINIB	TRANYLCYPROMINE	1.25	2.5	-68.54	nM
1	IMATINIB	TRANYLCYPROMINE	1.25	5	-65.88	nM
1	IMATINIB	TRANYLCYPROMINE	2.5	0	-60.18	nM
1	IMATINIB	TRANYLCYPROMINE	2.5	1.25	-75.33	nM
1	IMATINIB	TRANYLCYPROMINE	2.5	2.5	-72.9	nM
1	IMATINIB	TRANYLCYPROMINE	2.5	5	-69.47	nM
1	IMATINIB	TRANYLCYPROMINE	5	0	-50.9	nM
1	IMATINIB	TRANYLCYPROMINE	5	1.25	-80.15	nM
1	IMATINIB	TRANYLCYPROMINE	5	2.5	-78.2	nM
1	IMATINIB	TRANYLCYPROMINE	5	5	-74.6	nM
